# Supplementary material
Source: ML conference proceedings conference paper supplement (https://proceedings.mlr.press/v139/kandiros21a.html)
Supplement: Supplementary file 2 [file kandiros21a-supp.zip]

Archive with 2 entries (2 files):
- link_to_code.txt
- supplementary.pdf
