# Supplementary material
Source: ML conference proceedings conference paper supplement (https://proceedings.mlr.press/v139/kandiros21a.html)
Supplement: Supplementary file 2 [file kandiros21a-supp.zip › link_to_code.txt]

https://github.com/nishanthd-google/mple_graph_dependence?fbclid=IwAR1TUXQz3BrBRvxozK0mLkaPAr1mqmZiyXpfBRCoKASliL0pFpRgSydixJA
